# Supplementary material for: SREBP1c mediates the effect of acetaldehyde on Cidea expression in Alcoholic fatty liver Mice
Source: PubMed Central journal article supplement (PMC5775393; doi:10.1038/s41598-018-19466-z), 2018-01-19

SREBP1c mediates the effect of acetaldehyde on Cidea expression in Alcoholic fatty liver Mice

**Authors:** Qi He<sup>1,2#</sup>, Yan Diao<sup>1,2#</sup>, Tingting Zhao<sup>1,2#</sup>, Baoyu Hou<sup>1,2</sup>, Linel Darrel Ngokana<sup>1,2</sup>, Huan Liang<sup>1,2,3</sup>, Junhui Nie<sup>1,2</sup>, Peizhu Tan<sup>1,2</sup>, Hui Huang<sup>1,2</sup>, Yanze Li<sup>1,2</sup>, Lin Qi<sup>4</sup>, Yuanyuan Zhao<sup>5</sup>, Ying Liu<sup>6</sup>, Xu Gao<sup>1,2,7\*</sup>, Lingyun Zhou<sup>1,2,\*</sup>

<sup>1</sup>Department of Biochemistry and Molecular Biology, Harbin Medical University, Harbin, China. <sup>2</sup>Translational Medicine Center of Northern China, Harbin, China.

<sup>3</sup>Department of Clinical Laboratory, Harbin Medical University Cancer Hospital, Harbin, China. <sup>4</sup>Department of Radioimmunoassay, Heilongjiang Province Hospital, Harbin, China. <sup>5</sup>Department of Anesthesiology, Heilongjiang Province Hospital, Harbin, China. <sup>6</sup>Department of Gastroenterology, Heilongjiang Province Hospital, Harbin, China. <sup>7</sup>Key Laboratory of Cardiovascular Medicine Research (Harbin Medical University), Ministry of Education, Harbin, China.

#These authors contributed equally to this work.

\*Corresponding author

E-mail: gaoxu\_671227@163.com; zhoulingyun27@sina.com

Supplementary Figure S1

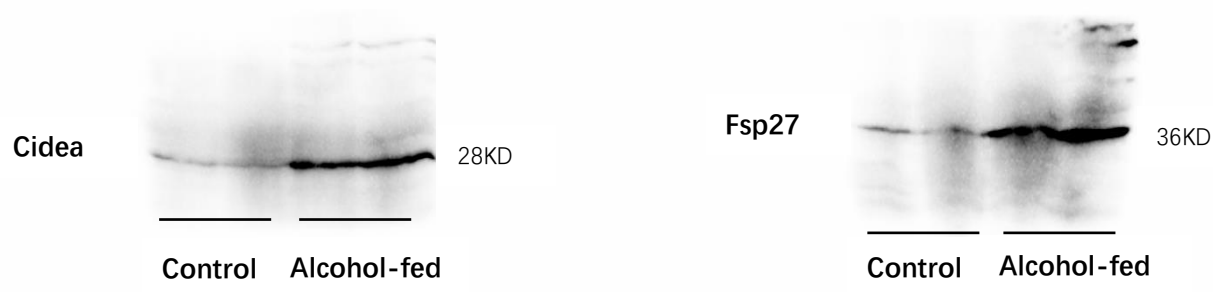

Supplement: 41598_2018_19466_MOESM1_ESM.pdf [file 41598_2018_19466_MOESM1_ESM.pdf]
